# Supplementary material
Source: publisher figshare collection journal article supplement (https://diabetesjournals.figshare.com/ndownloader/files/28570875)
Supplement: Supplementary file 1 [file 28570875]

# Advancing therapy in suboptimally controlled basal insulin-treated type 2 diabetes: Clinical outcomes with iGlarLixi versus premix BAsp 30 in the SoliMix randomized controlled trial

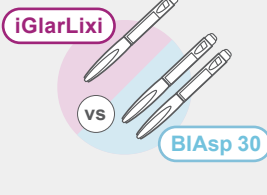

## Authors:

Julio Rosenstock<sup>1</sup>, Rifat Emral<sup>2</sup>, Leonardo Saugue-Reynal<sup>3</sup>, Vishwanathan Mohan<sup>4</sup>, Carlos Trescoli<sup>5</sup>, Said Al Sifri<sup>6</sup>, Heboisa Lalic<sup>7</sup>, Agustina Alvarez<sup>8</sup>, Pascaline Picard<sup>9</sup>, Mirielle Bonnemare<sup>10</sup>, Nadine Demit<sup>11</sup>, Rory J. McCrimmon<sup>12</sup>, on behalf of the SoliMix Trial Investigators

## Affiliations:

<sup>1</sup>Dallas Diabetes Research Center at Medical City, Dallas, TX, USA; <sup>2</sup>Department of Endocrinology and Metabolic Diseases, Ankara University Faculty of Medicine, Ankara, Turkey; <sup>3</sup>Instituto de Diabetes Obesidad y Nutrición S.C., Cuernavaca, Morelos, Mexico; <sup>4</sup>Dr. Mohan's Diabetes Specialities Centre & Madras Diabetes Research Foundation, IDF Centre of Excellence in Diabetes Care & ICMR Centre for Advanced Research on Diabetes, Chennai, India; <sup>5</sup>Hospital Universitario de La Ribera, Alzira, Spain; <sup>6</sup>Al Hadra Military Hospital, Taif, Saudi Arabia; <sup>7</sup>Faculty of Medicine of the University of Belgrade, Clinic for Endocrinology, Diabetes and Metabolic Diseases, Clinical Center of Serbia, Belgrade, Serbia; <sup>8</sup>Sanofi, Buenos Aires, Argentina; <sup>9</sup>VIDATA Life Sciences, Levallois-Perret, France; <sup>10</sup>Sanofi, Paris, France; <sup>11</sup>Diabetes Medical Operation Department, Sanofi, Chilly-Mazarin, France; <sup>12</sup>Division of Systems Medicine, School of Medicine, University of Dundee, Dundee, UK

## Introduction

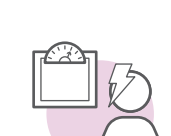

For people with T2D on basal insulin who fail to reach their recommended glycemic targets, options for treatment advancement include:

- Basal insulin + progressive addition of rapid-acting insulin
- Premix insulin
- Basal insulin + GLP-1 RA
- Fixed-ratio combination (FRC) of basal insulin + GLP-1 RA

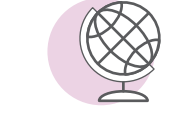

All these treatment options have been shown to improve glycemic control when used to advance therapy from basal insulin, but are associated with specific side-effects:

- GLP-1 RA therapy can be associated with gastrointestinal AEs and resultant adherence issues
- Basal + rapid-acting insulin and premix insulin regimens can increase the risk of hypoglycemia and weight gain, require multiple daily injections and frequent glucose monitoring

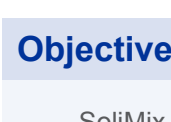

Globally, premix insulins are widely used to advance insulin therapy from basal insulin

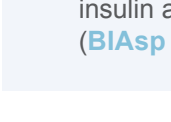

**iGlarLixi** is a once-daily titratable FRC of basal insulin glargine 100 U/mL (iGlar) and the GLP-1 RA, lixisenatide (Lixi), which offers an alternative option to premix insulin for treatment advancement

## Objective

SoliMix is the first RCT to directly compare the efficacy and safety of an FRC of basal insulin and GLP-1 RA, **iGlarLixi**, with premix insulin analog, biphasic insulin aspart 30 (**BAsp 30**), in people with T2D advancing from basal insulin plus one or two OADs

## Methods

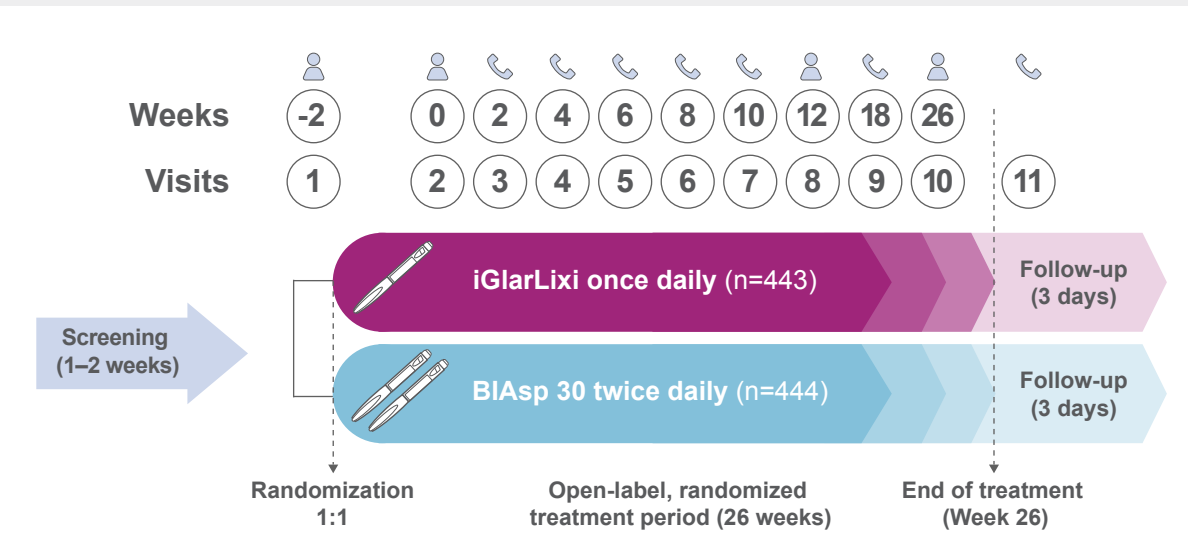

## Primary efficacy endpoints

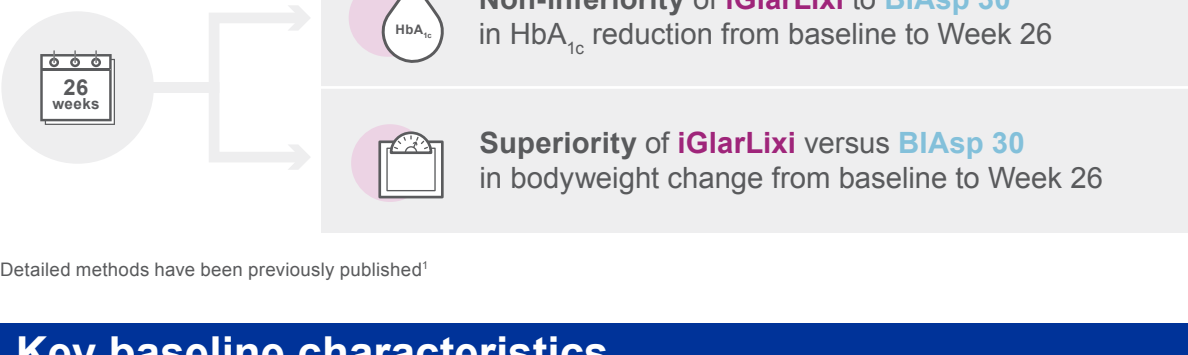

## Key baseline characteristics

Overall, baseline characteristics did not differ between the two treatment groups (randomized population)

|                          | Mean ± SD age, years | Sex, % female | Mean ± SD BMI, kg/m <sup>2</sup> | Mean ± SD duration of T2D, years | Mean ± SD HbA <sub>1c</sub> , % | Mean ± SD HbA <sub>1c</sub> , mmol/mol |
|--------------------------|----------------------|---------------|----------------------------------|----------------------------------|---------------------------------|----------------------------------------|
| <b>iGlarLixi</b> (n=443) | 59.8 ±10.3           | 49.4%         | 29.7 ±4.7                        | 13.0 ±7.1                        | 8.6 ±0.7                        | 71 ±7                                  |
| <b>BAsp 30</b> (n=444)   | 59.8 ±10.0           | 50.9%         | 30.0 ±5.1                        | 13.0 ±7.4                        | 8.6 ±0.7                        | 70 ±7                                  |

Further details on baseline characteristics have been previously published<sup>1</sup>

## Key results: Efficacy

Both primary efficacy endpoints were met: **iGlarLixi** demonstrated non-inferiority in HbA<sub>1c</sub> reduction and superiority in bodyweight change from baseline to Week 26 versus **BAsp 30** (ITT population). Secondary analyses showed iGlarLixi was superior to **BAsp 30** in HbA<sub>1c</sub> reduction

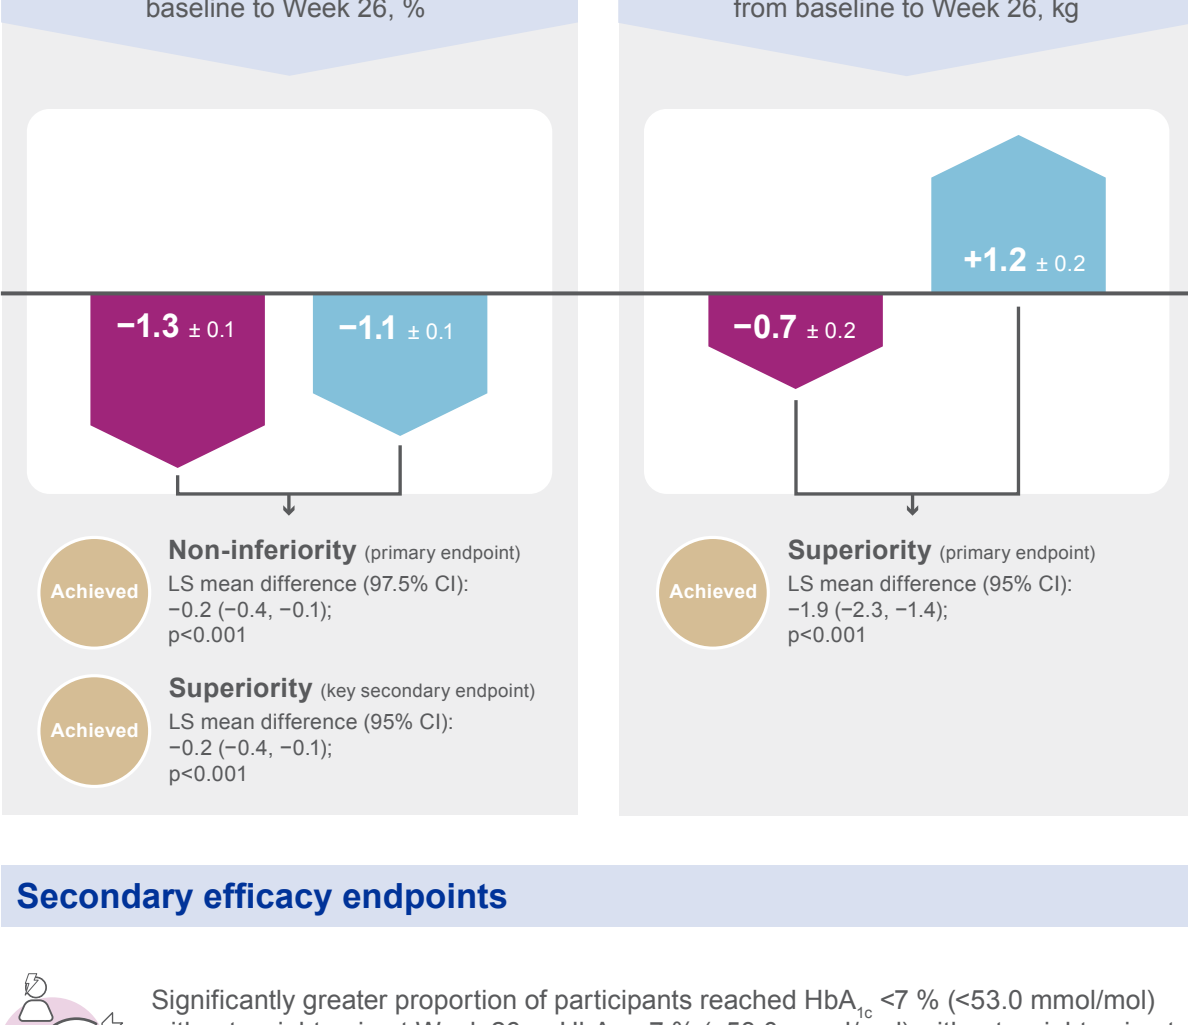

## Secondary efficacy endpoints

Significantly greater proportion of participants reached HbA<sub>1c</sub> <7 % (<53.0 mmol/mol) without weight gain at Week 26 or HbA<sub>1c</sub> <7 % (<53.0 mmol/mol) without weight gain at Week 26 and without hypoglycemia (<70 mg/dL [ $<3.9$  mmol/L]) during the treatment period in the **iGlarLixi** versus **BAsp 30** group (key secondary endpoints<sup>\*</sup>; ITT population)

The proportion of participants reaching HbA<sub>1c</sub> <7 % was greater with **iGlarLixi** versus **BAsp 30** (exploratory analysis<sup>†</sup>; ITT population)

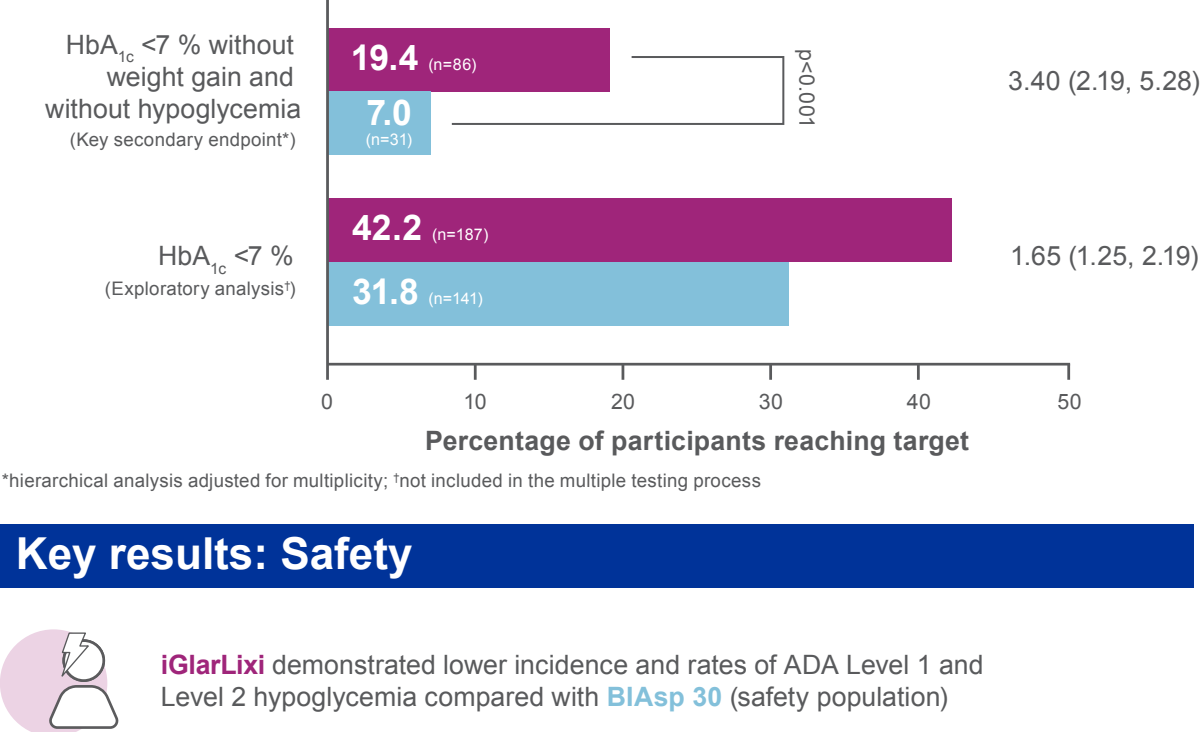

## Key results: Safety

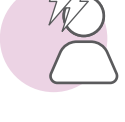

**iGlarLixi** demonstrated lower incidence and rates of ADA Level 1 and Level 2 hypoglycemia compared with **BAsp 30** (safety population)

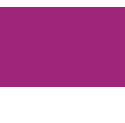

**iGlarLixi** also demonstrated lower incidence and rates of ADA Level 2 hypoglycemia compared with **BAsp 30** between bedtime and waking, or between midnight and 6am

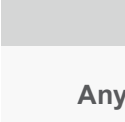

ADA Level 3 hypoglycemia (severe hypoglycemia; any event with severe cognitive impairment requiring assistance for recovery) was low with one event in the **iGlarLixi** group and two events in the **BAsp 30** group

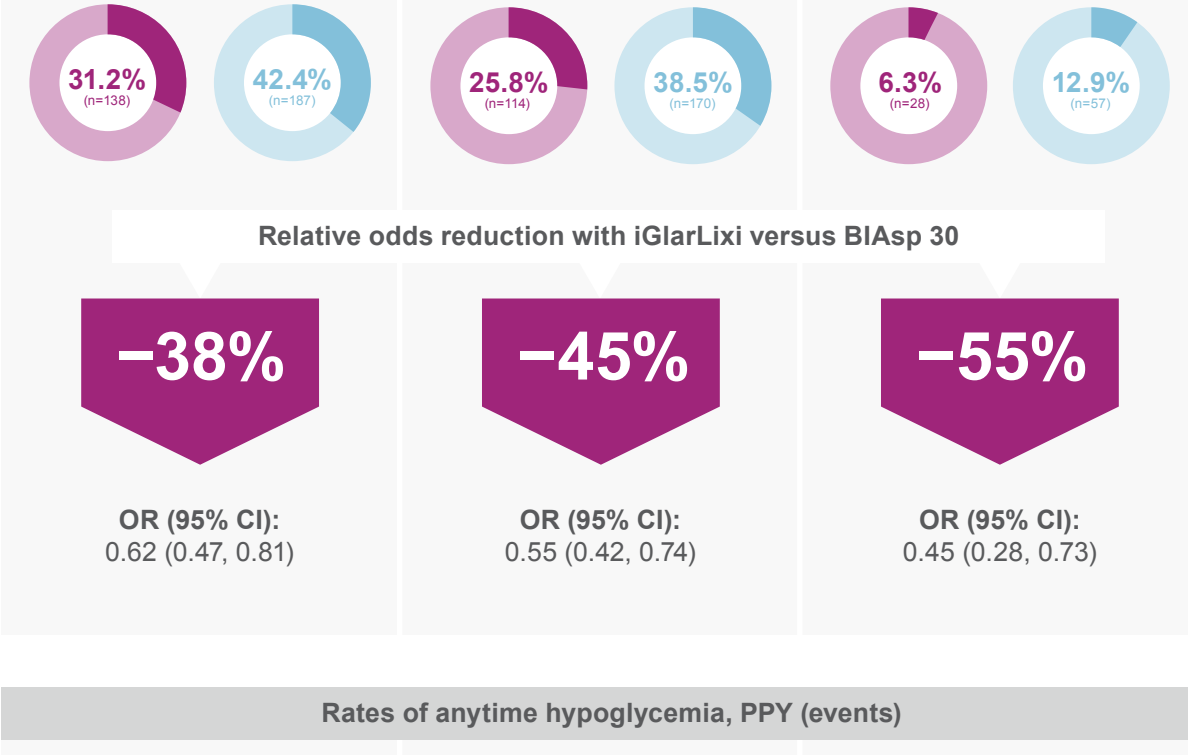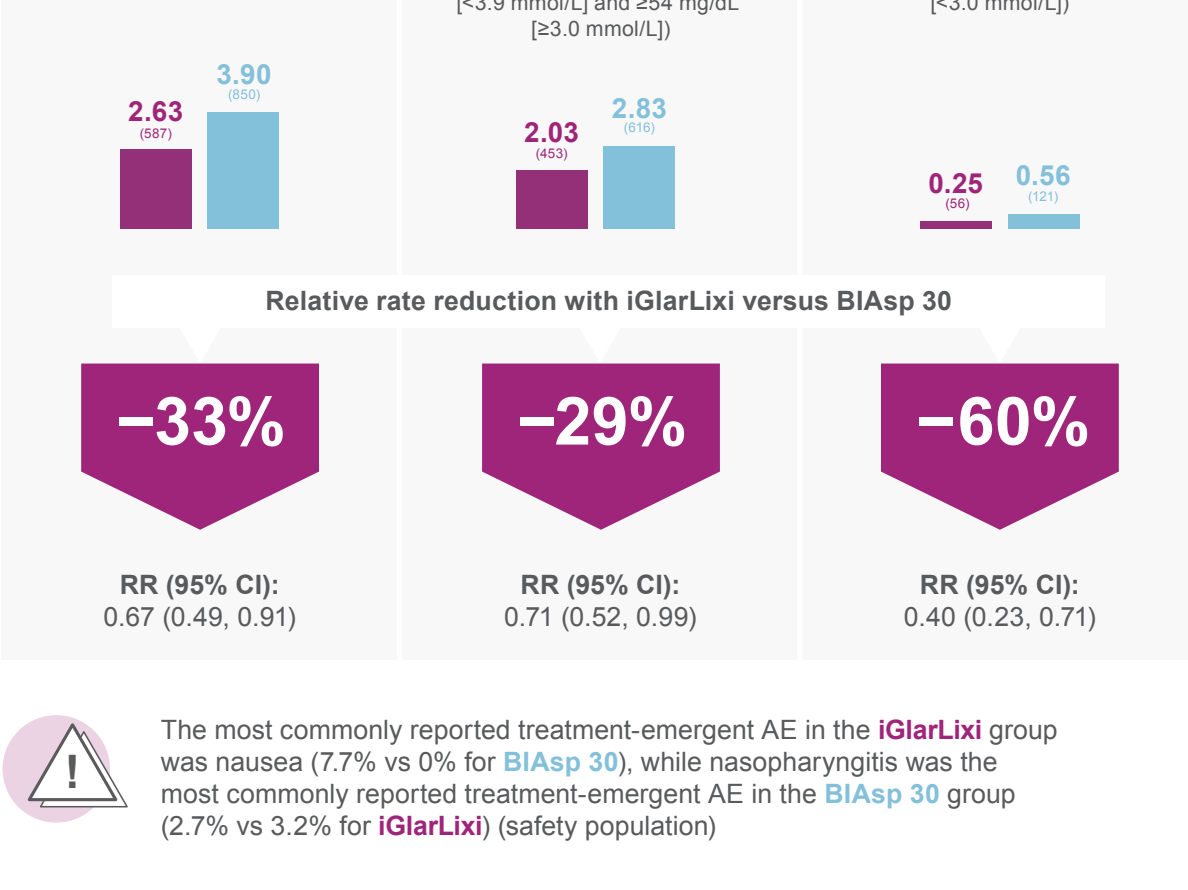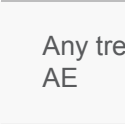

The most commonly reported treatment-emergent AE in the **iGlarLixi** group was nausea (7.7% vs 0% for **BAsp 30**), while nasopharyngitis was the most commonly reported treatment-emergent AE in the **BAsp 30** group (2.7% vs 3.2% for **iGlarLixi**) (safety population)

| n (%)                                       | <b>iGlarLixi</b> (n=442) | <b>BAsp 30</b> (n=441) |
|---------------------------------------------|--------------------------|------------------------|
| Any treatment-emergent AE                   | 144 (32.6)               | 122 (27.7)             |
| Any serious AE                              | 12 (2.7)                 | 13 (2.9)               |
| Any AE leading to treatment discontinuation | 4 (0.9)                  | 4 (0.9)                |
| Any AE leading to death                     | 0 (0)                    | 2 (0.5)                |

## Conclusions

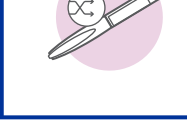

Compared with twice-daily **premix BAsp 30**, once-daily FRC **iGlarLixi** demonstrated better glycemic control and weight benefit with less hypoglycemia

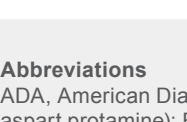

**iGlarLixi** is a more efficacious, simpler, and well-tolerated alternative to **premix BAsp 30** for advancing diabetes in people with T2D providing suboptimally controlled with basal insulin plus OADs

## Abbreviations

ADA, American Diabetes Association; AE, adverse event; BAsp 30, biphasic insulin aspart 30 (30% insulin aspart + 70% insulin aspart protamine); BMI, body mass index; CI, confidence interval; GLP-1 RA, glucagon-like peptide-1 receptor agonist; HbA<sub>1c</sub>, glycated hemoglobin; iGlarLixi, a fixed-ratio combination of insulin glargine 100 U/mL and the GLP-1 RA, lixisenatide; ITT, intent-to-treat; LS, least squares; OAD, oral antihyperglycemic drug; OR, odds ratio; PPY, per participant-year; PY, participant-year; RCT, randomized controlled trial; RR, rate ratio; SD, standard deviation; SE, standard error; SGLT2i, sodium glucose co-transporter 2 inhibitor; T2D, type 2 diabetes

## References

<sup>1</sup>McCrimmon et al. *Diabetes, Obes Metab*. 2021;23(6):1221–1231

## Acknowledgments

The authors thank the study participants, trial staff, and investigators for their participation. We thank Elisabeth Sotouhmi, MD (Sanofi) for a courtesy review from a medical and scientific perspective, Mathieu Couderc, MSc (Sanofi) for a courtesy review from a statistical perspective, and Ana Merino-Trigo, PhD (Sanofi) for coordinating the development, facilitating author discussions, and review of this infographic. Editorial assistance was provided by Fishawack Communications Ltd., part of Fishawack Health.

## Funding

Sponsorship for this study was funded by Sanofi, Paris, France. Editorial assistance provided by Fishawack Communications Ltd. was funded by Sanofi.

## Author contributions

All named authors meet the International Committee of Medical Journal Editors (ICMJE) criteria for authorship. All authors participated in the interpretation of the data, writing, reviewing, and editing, and had final responsibility for approving the published version.

Julio Rosenstock, MD, and Pascaline Picard, MSc, are the guarantors of this work and, as such, have full access to all the data in this study and take responsibility for the integrity of the data and accuracy of the data analysis.

## Disclosures

JR has served on advisory panels for Applied Therapeutics, Boehringer Ingelheim, Eli Lilly, Intarcia, Janssen, Novo Nordisk, Oramed, Sanofi, and Zealand; and has received research support from Applied Therapeutics, AstraZeneca, Boehringer Ingelheim, Eli Lilly, Genentech, GlaxoSmithKline, Intarcia, Janssen, Lexicon, Merck, Novo Nordisk, Oramed, Pfizer, and Sanofi. RE has acted as an advisor and speaker for AstraZeneca, Boehringer Ingelheim, Lilly, MSD, Novo Nordisk, and Sanofi. LSR has acted as an advisor and speaker for Novo Nordisk, Sanofi, and Boehringer Ingelheim. NL has acted as a speaker for Sanofi, AstraZeneca, Boehringer Ingelheim, Eli Lilly, Novo Nordisk, and Merck. VM has served on advisory panels and has acted as a speaker for Abbott, Boehringer Ingelheim, Eli Lilly, Merck (MSD), Novo Nordisk, Sanofi, and several Indian pharmaceutical companies. He has also received research grants from some of these companies. CT has been an investigator in clinical trials for Eli Lilly and Sanofi, and has acted as a speaker for AstraZeneca, Boehringer Ingelheim, Eli Lilly, Novo Nordisk, and Sanofi. SAS has acted as an advisor and speaker for AstraZeneca, Boehringer Ingelheim, Eli Lilly, MSD, Novartis, Novo Nordisk, and Sanofi. ND, AA, and MB are employees of Sanofi and may hold shares and/or stock options in the company. PP is an employee of VIDATA Life Sciences working as an external contractor on behalf of Sanofi. RM has acted as an advisor and speaker for Sanofi and Novo Nordisk.

This infographic represents the opinions of the authors. For a full list of declarations, including funding and author disclosure statements, please see the full text online. [Full manuscript](#)
